---

# EVENT-BASED PATTERN DETECTION IN ACTIVE DENDRITES

---

PREPRINT

**Johannes Leugering\***  
Osnabrück University, Germany  
jleugeri@uni-osnabrueck.de

**Pascal Nieters\***  
Osnabrück University, Germany  
pnieters@uni-osnabrueck.de

**Gordon Pipa**  
Osnabrück University, Germany  
gpipa@uni-osnabrueck.de

August 7, 2020

## ABSTRACT

Many behavioural tasks require an animal to integrate information on a slow timescale that can exceed hundreds of milliseconds. How this is realized by neurons with membrane time constants on the order of tens of milliseconds or less remains an open question. We show, how the interaction of two kinds of events within the dendritic tree, *excitatory postsynaptic potentials* and locally generated *dendritic plateau potentials*, can allow a single neuron to detect specific sequences of spiking input on such slow timescales. Our conceptual model reveals, how the morphology of a neuron's dendritic tree determines its computational function, which can range from a simple logic gate to the gradual integration of evidence to the detection of complex spatio-temporal spike-sequences on long time-scales. As an example, we illustrate in a simulated navigation task how this mechanism can even allow individual neurons to reliably detect specific movement trajectories with high tolerance for timing variability. We relate our results to conclusive findings in neurobiology and discuss implications for both experimental and theoretical neuroscience.

## 1 Introduction

2 The ability to detect long-lasting sequences of neural activity is crucial for complex behavior, but poses a serious  
3 challenge for most established neuron models. Consider a rodent navigating through an environment in search for  
4 food. Receptive fields of place and grid cells tile a spatial map of the environment and encode the current position by  
5 their respective population activities [1, 2]. But in order to find its way back, the animal needs to know not only its  
6 present location, but also which path it took to get there. Decoding this path from the sequential activation of place and  
7 grid cells requires the integration of information on behavioural timescales that can span hundreds of milliseconds or  
8 more [3, 4]. Relevant patterns on such long timescales may prove to be a ubiquitous phenomenon, and have already been  
9 documented for a wide range of sensory processing tasks, such as olfaction [5, 6] or cortical auditory processing [7].

10 This raises the puzzling question, how such long sequences of neural activity can be processed by volatile neurons  
11 with membrane time constants on the timescale of tens of milliseconds or less [8]. While this problem is typically  
12 addressed on a network level, e.g. by relying on effects of fast-acting synaptic plasticity [9] or slow emergent dynamics  
13 due to recurrent connections [10], we argue that it can be solved on the level of individual neurons by active processes  
14 within their dendritic trees. These localized processes endow neurons with internal memory traces on the timescale of  
15 hundreds of milliseconds, and can be captured in a simple, conceptual model that adheres to recent biological evidence  
16 not accounted for in integrate-and-fire neuron models.

17 By investigating the computational properties of neurons with active dendrites, we conclude that:

- 18 1. Active dendritic processes can implement complex spatio-temporal receptive fields for ordered sequences of  
19 synaptic inputs
- 20 2. Active dendritic processes enable the robust integration of weak signals over long time-scales.
- 21 3. When analyzed from a rate-coding perspective, active dendritic processes can produce sophisticated nonlinear  
22 computations determined by the neuron's dendritic morphology

---

\*Both authors contributed equally.

23 We demonstrate these propositions in a general computational framework for event-based, active dendritic sequence  
24 processing (ADSP), which offers an elegant solution to the problem of detecting highly variable, long lasting patterns in  
25 a neuron's input.

## 26 **Neural dynamics is driven by active dendritic processes**

27 We derive our abstract model of dendritic computation from a few basic biological observations: Most of a cortical  
28 pyramidal neuron's excitatory synaptic inputs terminate on dendritic spines [11], where post-synaptic ion channels  
29 are activated via the stochastic, pre-synaptic release of glutamate-carrying vesicles [12, 13]. The activated channels,  
30 primarily controlled by  $\alpha$ -amino-3-hydroxy-5-methyl-4-isoxazolepropionic acid receptors (AMPA) [14], become  
31 conductive to a mixture of ions, which leads to a brief depolarization in the corresponding spine, referred to as the  
32 *excitatory post-synaptic potential* (EPSP) [15]. These voltage changes in nearby spines induce a modest depolarization  
33 in the local dendritic membrane potential [16], which passively propagates along the dendrite as described by neural  
34 cable theory (**Fig. 1c**). For very specific branching patterns, the passive propagation of activity along a neuron's dendrite  
35 can be simplified to an equivalent model of a cylinder, in which the contribution of individual synaptic inputs sum  
36 (sub-)linearly [17]. Since propagation along the cylinder is very fast, abstract point-neuron models such as leaky  
37 integrate-and-fire neurons ignore the spatial dimension of the dendritic tree entirely and model the neuron as if it were a  
38 single electric compartment [18]. However, in this purely passive model of dendritic integration, the attenuation of  
39 signals along the dendritic cable is so strong, that synaptic input onto thin apical dendrites should have little, if any,  
40 measurable effect on the membrane potential at the soma far away [19, 20]. This apparent problem could be resolved by  
41 a synaptic plasticity mechanism that proportional up-scales synaptic efficacies to compensate for the distance-dependent  
42 attenuation. This phenomenon, aptly termed "dendritic democracy"[21], has been shown in hippocampal pyramidal  
43 neurons [22], where it results in a similar contribution of synaptic inputs onto the somatic membrane potential —  
44 regardless of the synapse's position along the dendrite. We instead look at a different mechanism to boost weak synaptic  
45 inputs, which relies on localized depolarizations that are actively generated and maintained within the dendritic tree.

46 Such active dendritic processes are ubiquitous [23, 24] and largely rely on N-methyl-D-aspartate receptor (NMDAR)  
47 gated ion-channels [14] (see **Fig. 1c** for a schematic representation of this mechanism). NMDAR gated channels, like  
48 their AMPAR gated counterparts, are activated in the presence of glutamate, but do not become conductive unless a  
49 channel-blocking  $Mg^+$  ion is first displaced by a sufficiently strong depolarization [25, 26]. This depolarization can be  
50 achieved by the coactivation of multiple AMPAR channels on nearby spines within a short time-window. Experimental  
51 as well as simulation studies report that this requires a volley of 4-20 or even up to 50 spikes within 1-4ms, depending  
52 on the location along the dendritic tree [16, 27, 28, 29]. The opening of NMDAR channels triggers a massive influx  
53 of different ionic currents that lead to a complete depolarization of a small segment of the dendritic arbor. While the  
54 isolated NMDAR response itself is reported to last on the order of at least 25ms [30], in vivo recordings reveal that  
55 voltage-gated channels in the dendritic membrane [20] prolong this effect, resulting in a depolarization that can last  
56 from tens to hundreds of milliseconds [31]. We focus on these longer lasting events, which we collectively refer to as  
57 *dendritic plateau potentials*, and argue, that they provide useful memory traces within the dendritic tree that can last  
58 hundreds of milliseconds.

59 The much larger depolarization during a plateau potential propagates further along the dendrite than the weaker effect  
60 of individual EPSPs and thus extends the range at which they can contribute to somatic action potential generation.  
61 This may even be required for generating or spiking [32] or bursting [33] output. Just like EPSPs, however, plateau  
62 potentials are still subject to considerable attenuation along the dendritic cable and thus have a strong effect only in  
63 their direct neighbourhood<sup>2</sup>. This leads to a division of complex dendritic arbors into functional subunits [34, 35, 36],  
64 which we here refer to as *dendritic segments*. How local plateau potentials in these segments interact within a dendritic  
65 tree depends on its morphology. In particular, the depolarizing effect on other directly connected dendritic segments  
66 is effectively raising their resting potential for the whole duration of the plateau potential, thus lowering the amount  
67 of coinciding spikes required to initiate a plateau potential there [37]. As [38] demonstrates, this local nonlinear  
68 interaction of dendritic segments due to NMDAR-gated channels can allow neural dendrites to become selective to  
69 specific sequences of synaptic inputs. While their work uses a biophysical, spatially extended neuron model to explain  
70 this behaviour, we instead derive a much simplified model composed of discrete dendritic segments. This helps explain  
71 how local interactions between connected segments lead to cascades of plateau potentials, which in turn allow the  
72 detection of specific long-lasting sequences within the dendritic tree.

73 Each segment of a dendritic tree tends to receive strongly correlated volleys of spikes on clustered synaptic inputs  
74 from some subpopulation of neurons [39, 40]. We propose, that such incoming spike volleys constitute elementary  
75 events that convey relevant information. The morphology of the dendritic tree then determines how this information is  
76 processed and retained in memory, and thereby endows the ADSP neuron with an intricate computational function.

<sup>2</sup>Unlike EPSPs, this attenuation cannot be circumvented by synaptic scaling as for dendritic democracy.

## 77 **The interaction of active dendritic processes realizes event-based computation.**

78 Based on the biological observations in the previous section, we can derive an abstract mathematical model of active  
79 dendritic sequence processing: Conceptually, the complex dynamics of dendritic membrane potentials can be reduced to  
80 the interactions of two kinds of events, EPSPs and actively generated plateau potentials, in a tree structure of dendritic  
81 segments. Since both of these events result in localized stereotypical effects on the dendritic membrane potential,  
82 we abstractly model them as rectangular pulses of unit magnitude and fixed duration  $\tau^{\text{syn}}$  and  $\tau^{\text{den}}$ , respectively. The  
83 qualitative behaviour of the dendritic arbor can thus be explained purely in terms of the locations and times at which  
84 EPSPs and plateau potential are initiated in its dendritic segments.

85 Only those incoming spikes that are successfully transmitted by the probabilistic synapses induce EPSPs in the  
86 postsynaptic segment, which sum up and constitute the total *synaptic input* into the segment. This input is particularly  
87 strong when a *volley* of multiple spikes occurs in a time-window short enough for their EPSPs to overlap. In addition to  
88 synaptic input, the electric coupling between directly connected dendritic segments provides another source of *dendritic*  
89 *input*.

90 When both the *synaptic* and *dendritic input* into a segment exceed critical thresholds, the segment enters a prolonged  
91 *plateau* state. For the whole duration of the plateau, all other directly connected segments receive depolarizing dendritic  
92 input. Segments of the dendritic tree therefore act as coincidence detectors that respond to highly synchronized volleys  
93 of spikes with plateau potentials. The precise thresholds for synaptic and dendritic input depend on the segment's  
94 location within the dendritic tree. While a large volley of spikes alone suffices to trigger a plateau in the outermost  
95 segments of the dendritic tree, internal segments require the additional dendritic input due to plateau potentials in  
96 connected segments. For segments that lie at branching points in the dendritic tree, more than one of their neighbours  
97 may have to be in a plateau state concurrently to have a sufficient effect. If the soma, which lies at the root of the  
98 dendritic tree, receives sufficient synaptic and dendritic input, a somatic action potential, rather than a plateau potential,  
99 is generated.

100 Since the small effects of EPSPs remain confined to the postsynaptic dendrite segment, they can only affect the neuron's  
101 behaviour indirectly by contributing to the generation of local plateau potentials. It is the plateau potentials and their  
102 interaction across neighbouring segments that drives the dendritic membrane potential, and therefore implements  
103 an event-based framework of dendritic computation on two distinct timescales orders of magnitude apart. On a fast  
104 timescale, the combined effect of a volley of coincident spikes can initiate a localized plateau potential. On a much  
105 slower timescale, the interaction of these plateaus provides an ephemeral memory of the recent history. The computation  
106 we have described here can be fully formalized in terms of synaptic spikes and plateau events as provided in the  
107 Methods section.

108 In **Fig. 1** we describe an exemplary ADSP neuron that receives input from five populations of neurons on five segments  
109 (**Fig. 1a**). Each segment, if sufficiently excited, responds to a spike volley in its respective input populations by emitting  
110 a plateau event at the time of the volley (**Fig. 1b**). The morphology of the dendritic tree determines how these plateaus  
111 interact along the dendritic tree. For example, segment *C* will only activate if both segments *A* and *B* are already active  
112 once segment *C* receives a spike volley. We can formalize the relative timing requirement for these three segments by  
113 the expression  $(A + B) \rightarrow_2 C$ , which indicates that all two child branches *A* and *B* must be simultaneously active to  
114 enable the parent segment *C*, allowing it to emit a plateau in response to a spike-volley. We can read this as "A and B,  
115 and then C" (see also **Fig. 1d**). If the threshold was lowered, such that input from either segment *A* or *B* alone would  
116 suffice, the expression would correspondingly become  $(A + B) \rightarrow_1 C$ , which translates to "A or B, and then C" (see  
117 also **Fig. 1e**). Generally, the expression  $(X_1 + X_2 + \dots + X_n) \rightarrow_m Y$  translates to "At least *m* out of the *n* segments  
118  $X_1, X_2, \dots, X_n$  must be simultaneously active to enable segment *Y*". By chaining multiple segments together, these  
119 timing relations and nonlinear combinations can be arbitrarily nested, as for example in **Fig. 1f** that shows a neuron  
120 implementing  $A \rightarrow_1 B \rightarrow_1 C$ , which can be read as "A, and then B, and then C". Using this formal notation, we can  
121 express the complex ADSP neuron example in **Fig. 1a** as  $((A + B) \rightarrow_2 C) + D \rightarrow_1 E$ , a computation on spike  
122 volleys originating from the input populations associated with segments *A*,  $\dots$ , *E*.

123 The interaction between connected dendritic segments facilitates cascades of plateau potentials along the dendritic tree,  
124 as illustrated in **Fig. 1b**. Starting in a distal segment, a leaf-node in our diagrams, a spike volley can initiate a plateau,  
125 which then provides dendritic input for the parent segment. Next, that segment responds to an incoming spike volley  
126 with a plateau of its own, in turn providing dendritic input to yet another segment. Whenever such a continuous chain  
127 of plateau potentials proceeds all the way to the soma, it culminates in a somatic action potential.

128 This signals to other neurons, that a specific sequence of spike volleys has been detected – on a timescale that may  
129 be as long as the number of segments times the plateau duration, i.e. hundreds of milliseconds. The precise timing  
130 between spike volleys is not prescribed exactly, as long as the distance between two successive volleys does not exceed  
131 the duration of one plateau potential.

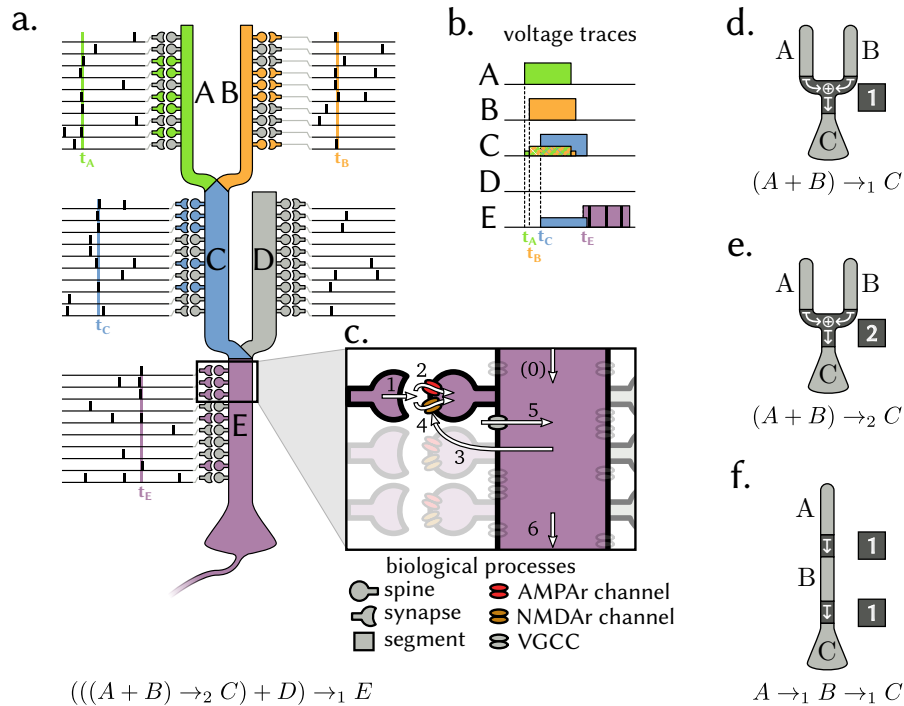

Figure 1: Schematic representation of a complex dendritic tree and its function. **a** A neuron receives on each of its 5 dendritic segments 10 synaptic connections from a corresponding neural population. Sufficiently many coincident spikes (here  $\geq 6$  out of 10) from population *A* can lead the corresponding dendritic segment to generate a plateau potential ( $t_A$ ). Similarly, coincident spikes from population *B* can induce a plateau in a parallel branch ( $t_B$ ). A third segment requires simultaneous input from both of these segments in addition to coincident synaptic input from population *C*, in order to fire a plateau of its own ( $t_C$ ). On another branch, a fourth segment receives its input from population *D* but does not trigger a plateau. A somatic spike is triggered when coincident synaptic input from population *E* arrives ( $t_E$ ) during dendritic input from either of its two upstream segments (in this case *C*). **b** Local membrane potentials show a cascade of plateau potentials. **c** The steps involved in the generation of a plateau: The membrane potential is already elevated due to a plateau potential in a neighbouring segment (0). Presynaptic input arrives at a synapse (1), which leads to a postsynaptic EPSP via AMPAR mediated ion channels (2). Once the local membrane potential is sufficiently depolarized due to coincident EPSPs and prior depolarization, voltage gated, NMDAR mediated ion channels open, causing additional depolarization (4) which can be further facilitated by the opening of voltage gated calcium channels (5). This strong depolarization initiates a longer lasting plateau potential in the dendritic segment, which has a modest depolarizing effect on other neighbouring segments (6). Different dendritic morphologies correspond to different computed functions, indicated in the respective formula under each schematic illustration. **d** If activating one of two dendritic branches with input from either population *A* or *B*, followed by a somatic spike initiated by input from population *C*, is sufficient to produce a spike, the neuron implements the operation  $(A + B) \rightarrow_1 C$ , which constitutes an "or"-operation between population *A* and *B*. **e** If simultaneous input from *A* and *B* is required, the neuron calculates an "and"-operation between inputs *A* and *B*. **f** A simple neuron that requires sequential activation of first *A* "and then" *B* before *C*.

132 The branching morphology of a dendritic tree therefore determines the computation performed by the neuron, which  
 133 allows even single neurons to detect complex compositions of sequential patterns. This event-based computation is  
 134 what we call active dendritic sequence processing (ADSP).

## 135 Results

### 136 Dendritic processing allows the rapid detection of long, time-invariant patterns

137 To demonstrate the practical implications of such neuronal sequence detection, we return to the example of a rat  
138 navigating an environment. We assume that the rat has an internal representation of its environment, tiled by the  
139 receptive fields of distinct populations of place cells. While the animal resides within such a receptive field, the  
140 corresponding population emits spike volleys with a magnitude that is largest when the animal is close to the center of  
141 the receptive field. Different paths lead the animal through some of these receptive fields in different order, and result in  
142 different sequences of spike volleys.

143 Each individual spike volley consists of several coincident spikes, the EPSPs of which have to be integrated and  
144 thresholded on a millisecond time-scale to detect sufficiently significant events in the presence of noise. To detect  
145 whether the animal has taken a specific path through the environment, only specific sequences of such significant spike  
146 volleys must be detected on a much slower behavioural time-scale. These two distinct time-scales pose a challenge for  
147 conventional spiking neuron models, which is further exacerbated by the fact, that the precise timing of the spike-volleys  
148 can vary substantially, depending e.g. on the speed with which the animal traverses its environment. While a solution to  
149 this problem may be found on a population level, we illustrate in **Fig. 2** how a single neuron can implement a solution  
150 very elegantly with just three active dendritic segments.

151 To simulate the rat's behaviour, we generate random movement trajectories through the environment by a stochastic  
152 process (see Methods section). Each place-cell population fires spike-volleys with a magnitude determined by the  
153 population's tuning-curve, a two-dimensional Gaussian function centered at the population's preferred location on a  
154 hexagonal grid. In this example, we are interested in paths that traverse three specific receptive fields, respectively  
155 color-coded in blue, orange and purple, and hence look at a neuron that consists of a chain of three dendritic segments,  
156 each receiving input from just one of these place-cell populations (**Fig. 2b**). The only trajectories that effectively  
157 drive the neuron to spike are those that sequentially traverse the three receptive fields in the correct order Blue  $\rightarrow_1$   
158 Orange  $\rightarrow_1$  Purple (**Fig. 2a**).

159 During the example path shown in solid black, the three place cell populations are activated in the correct order over the  
160 course of 200ms and emit sufficiently large spike volleys to trigger a cascade of plateau potentials that lead the neuron  
161 to emit a somatic spike **Fig. 2b**. To illustrate how reliable of a detector an individual neuron can be — even when its  
162 synaptic inputs are stochastic with a transmission probability of 0.5 —, we systematically evaluate the probability of the  
163 neuron to fire in response to different paths with varying directions and lateral offsets. For an ideal straight 200ms long  
164 path through the center of all three place cell populations, the firing probability of the neuron is around 75%. When  
165 the orientation of the path is varied, this probability sharply decreases to 0%, indicating that the neuron is both highly  
166 sensitive and highly specific for paths with this orientation (**Fig. 2c**). Similarly, when the path is shifted orthogonally to  
167 the movement direction, the response probability falls quickly, confirming that the neuron is sensitive to the absolute  
168 location of the path as well as its direction (**Fig. 2d**).

169 A remarkable feature of this mechanism is, that it is invariant to changes in the precise timing of the individual volleys  
170 as long as two consecutive segments are activated within one plateau duration  $\tau$  of each other. The ADSP Neuron can  
171 therefore detect paths of any duration from 0ms to  $N\tau^{\text{den}}$ ms, where  $N = 3$  is the number of consecutive segments.  
172 We believe this source of timing-invariance to be a highly beneficial feature for generalization that might help explain  
173 phenomena, where the same sequence of events must be detected across multiple time-scales.

### 174 Plateaus integrate evidence on long time-scales

175 In the previous example, specific paths are recognized by memorizing the sequential activation of different neural  
176 populations on a slow behavioural time-scale. A seemingly different, yet in fact closely related problem is the integration  
177 of individually unreliable bits of evidence over time. Consider, for example, a population of neurons that extract some  
178 relevant feature of a stimulus, such as the local movement direction in a visual moving dots stimulus. If we assume  
179 a retinotopic mapping, neighbouring neurons are highly correlated, and whenever the local movement direction is  
180 apparent, we expect a couple of neighbouring neurons coding for that direction to produce a volley of spikes. However,  
181 these events are unlikely to occur at the exact same point in time throughout the entire input space. The decision,  
182 whether or not the visual flow is in a certain direction, therefore requires that a neuron can integrate many such pieces of  
183 evidence, each indicated by a spike volley event, over a longer time-scale. Despite the all-or-none response of dendritic  
184 plateaus, a neuron with sufficiently many dendritic segments can in fact approximate such a smooth integration of  
185 evidence on time-scales of hundreds of milliseconds!

186 We give an example of evidence integration using dendritic plateau potentials in a simplified experiment, in which a  
187 neuron with 1000 dendritic compartments receives input from a population of 1000 input neurons through a total of

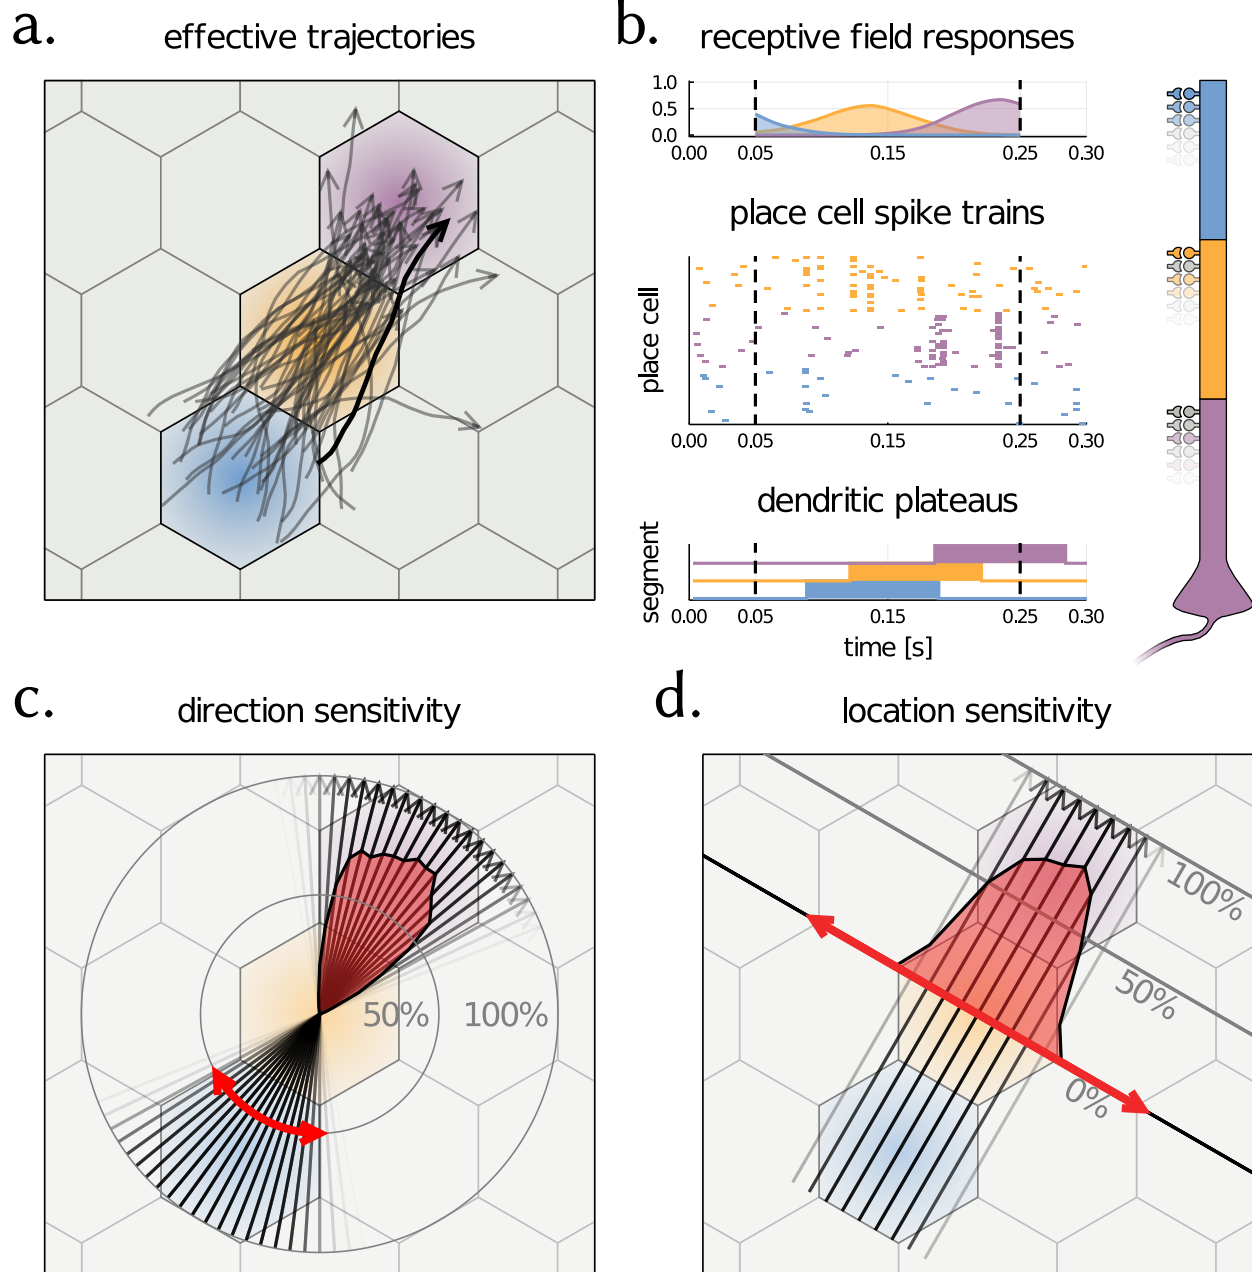

Figure 2: A simple neuron with three dendritic segments arranged as shown to the right of panel b can detect directed paths on a timescale of  $300ms$ . **a.** The receptive fields of place cell populations tile the environment through which the animal moves in a hexagonal grid. Random trajectories are generated through a stochastic process with randomized initial positions, velocities and angular heading to simulate the animal's movements. **b.** While the animal follows the black trajectory through space, the response of the place cell populations' tuning curves show the sequential activation of the populations over time (top panel). The generated spikes (middle panel) lead to a temporal sequence of dendritic plateaus (bottom panel) that results in a somatic spike. **c. and d.** The neuron responds with high probability to exactly those paths that traverse the desired receptive fields in the correct direction and with little lateral offset. The empirical firing probabilities to the black paths are shown by the superimposed density plot in red in polar and Cartesian coordinates, respectively.

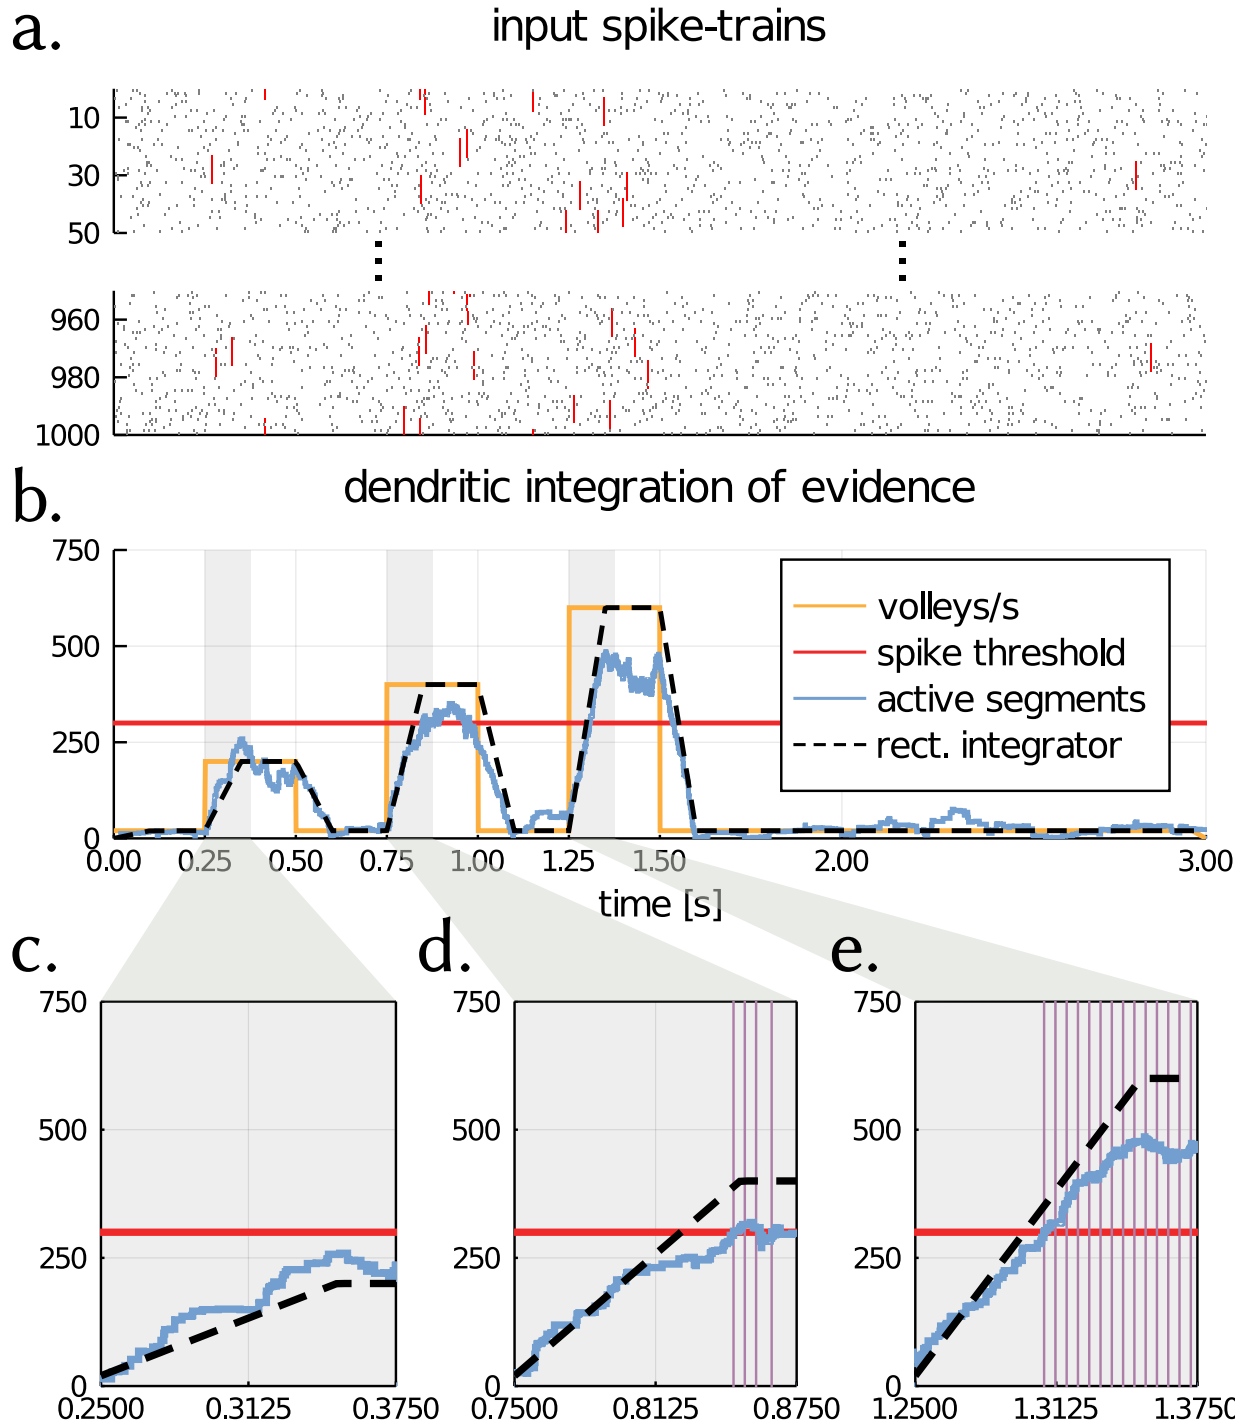

Figure 3: Dendritic plateaus can be used to gradually integrate evidence over long time periods. **a** A neuron with 1000 dendritic segments is driven by 1000 incoming spike-trains. Embedded in these spike-trains are spike volleys of 10 coincident spikes each, spread across 10 neighbouring neurons (shown in red). **b** The rate of spike volleys is determined by an input signal (orange line). Each segment receives input from 20 consecutive neurons through stochastic synapses with transmission probability  $p = 0.5$ , and requires 5 coincident spikes to trigger a plateau potential. The total number of co-activated dendritic segments (blue line) follows the convolution of the stimulus signal with a rectangular filter of length 100ms (black dashed line). **c-e** For increasing levels of stimulation, the number of co-activated segments rises faster and saturates at a higher level, crossing the threshold required for spike initiation (horizontal red line) at an earlier point in time or not at all, resulting in a sequence of spikes (vertical purple lines).

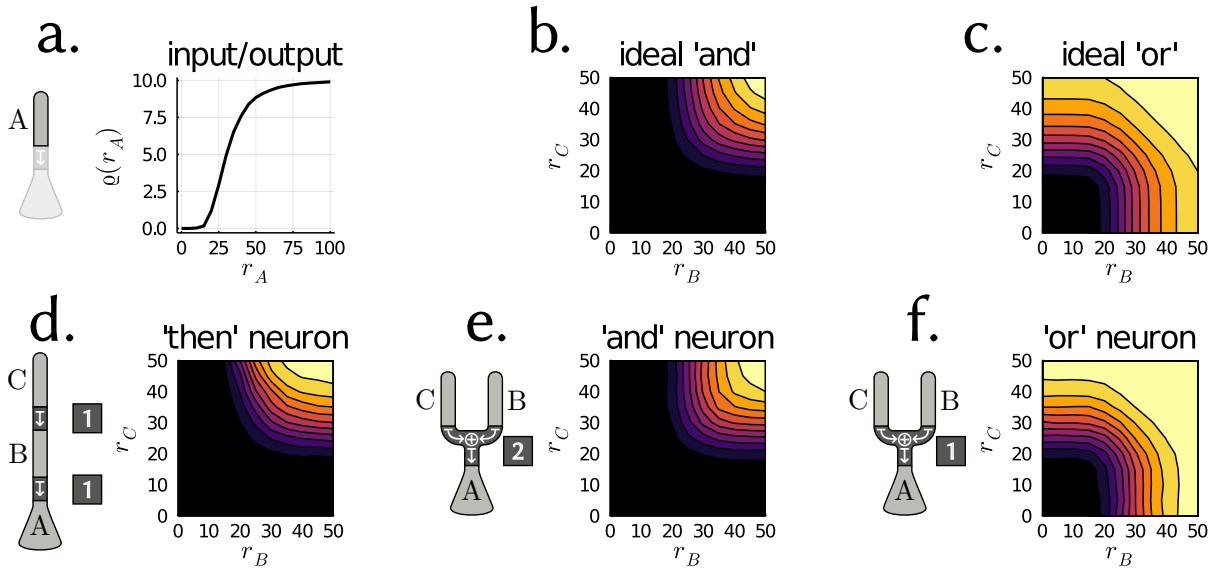

Figure 4: A rate-based analysis reveals well-known computational primitives. **a** A single dendritic compartment that receives independent Poisson-spike trains at a fixed rate  $r_A$  from a population of 25 neurons responds with plateaus at a rate that can be expressed as a non-linear sigmoidal function  $\rho(r_A)$ . For multiple dendritic segments, each of which receives input from an identical but independent population  $A, B$  or  $C$ , the neuron's computation depends on the dendritic morphology. **d and e** If both segments  $C$  and  $B$  are required to enable a somatic spike, the neuron's firing rate is proportional to an idealized "and" operation between the two inputs. **f** If either of the two segments suffices, the firing rate instead resembles an idealized "or" operation.

188 20,000 stochastic synapses (**Fig. 3**). The weak signal to be integrated by the ADSP neuron is encoded into spike volleys  
 189 of 10 simultaneous spikes from adjacent neurons of the input population. Each dendritic segment of the ADSP neuron  
 190 is connected to a different set of 20 adjacent neurons in the input population, and a total of 300 dendritic segments are  
 191 required to be in simultaneous plateau states for the neuron to emit a somatic spike.

192 Because each spike volley is likely to activate a different dendritic segment, we expect the number of simultaneously  
 193 active dendritic compartments to reflect the average rate of incoming spike volleys during a time-interval of one plateau  
 194 duration. This corresponds to a filtering of the time-varying rate by a rectangular filter, and, for a brief interval after  
 195 stimulus onset, represents an ideal integrator. We observe this exact behavior by driving the rate, at which spike volleys  
 196 are generated by the input population, to three different levels for brief time-intervals (**Fig. 3b**, orange line). The number  
 197 of co-activated dendritic segments (blue line) closely follows the theoretical prediction of an ideal rectangular filter  
 198 (black dashed line) until saturation. In particular, during the rising flanks right after stimulus onset (**Fig. 3c, d and e**),  
 199 we see the number of co-active segments rise with a slope proportional to the intensity of the stimulus until it saturates  
 200 after 100ms. The neuron begins firing spikes once sufficiently many segments are active (red line). This is exactly the  
 201 behavior expected for evidence integration: The ADSP neuron will fire sooner if the amount of evidence encoded in the  
 202 stimulus is stronger, and will not fire at all if it remains sub-critical.

203 Interestingly, the stochasticity of synaptic transmission helps to further decorrelate the partially overlapping input to  
 204 different dendritic segments, and can regulate the total amount of evidence required to reach the neuron's physiologically  
 205 fixed spiking threshold. Also, while the example here makes use of just a single "layer" of dendritic segments directly  
 206 driving the soma, this idea can be extended to deeper chains of multiple segments, such as in the previous example, to  
 207 allow for the integration of evidence and non-linear combination thereof on time-scales even longer than one plateau  
 208 duration.

## 209 Dendritic morphology determines computational function

210 In the two previous examples, we assume that each dendritic segment is driven by well-timed volleys of coincident  
 211 spikes, the magnitudes of which represent the magnitude of an underlying signal. But in theoretical neuroscience, the  
 212 function of a neuron is often analyzed in a rate-based framework, which relates only the average firing rate of a neuron  
 213 to the average firing rates of its spiking inputs.



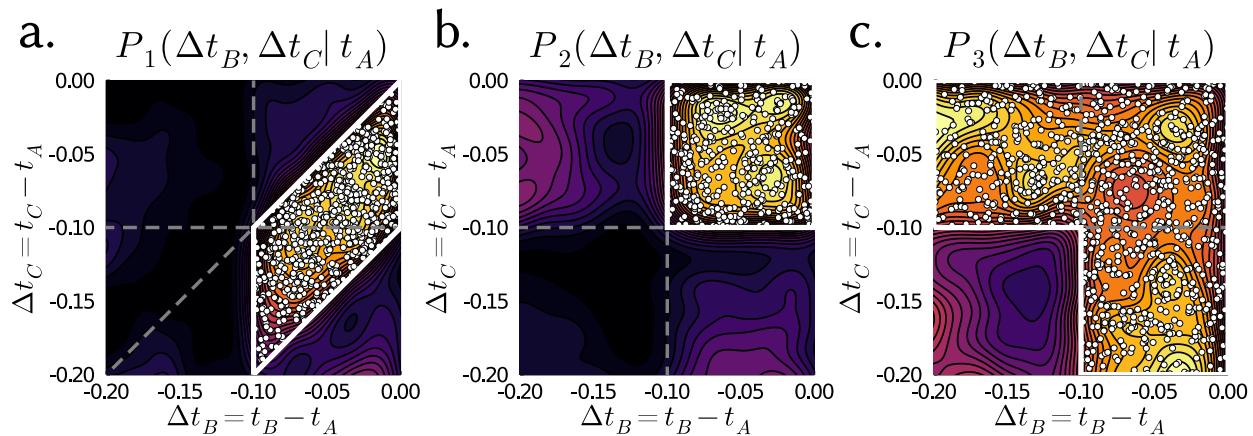

Figure 5: Dendritic morphology imposes timing constraints not revealed by rate-based analysis. For the neurons shown in figure 4, the joint probability distribution of relative timings  $\Delta t_B, \Delta t_C$  of dendritic plateaus directly preceding a somatic spike at  $t_A$  show a distinct temporal structure (contour-plots). **a** For the "then" neuron, a plateau in segment  $C$  must precede a plateau in segment  $B$  by at most 100ms, which in turn must occur at most 100ms before a somatic spike can be triggered. This is evident by the fact that all unambiguous cases, where exactly one plateau in each segment  $C$  and  $B$  was observed before a somatic spike, fall into the corresponding parallelogram-shaped domain (white dots). **b** This is in contrast to the "and" neuron, which despite showing a similar rate-response requires both inputs to occur within 100ms before the somatic spike. **c** The "or" neuron only requires either of the populations  $B$  or  $C$  to trigger a plateau within 100ms before a somatic spike.

214 Applying this sort of analysis to our proposed neuron model reveals, how different morphologies of dendritic arbors give  
 215 rise to different non-linear computations. A dendritic segment driven by independent Poisson spike-trains originating  
 216 from some population  $A$  of 25 neurons respond by triggering plateau potentials at a rate  $\varrho(r_A)$  that continuously depend  
 217 on the fixed firing-rate  $r_A$  of the populations' neurons. Here, 8 coincident spikes are required to trigger a plateau. As  
 218 each plateau lasts for 100ms,  $\varrho$  saturates at a rate of 10 plateaus per second for large inputs (**Fig. 4a**). In more complex  
 219 neurons composed of three dendritic segments, each of which is driven by an identical but independent population of  
 220 neurons, we analyze the relative contributions of the populations  $B$  and  $C$  in the same way. In these experiments, we  
 221 hold the firing rate  $r_A = 25$  constant. For a neuron  $C \rightarrow_1 B \rightarrow_1 A$ , whose segments are sequentially chained together,  
 222 a spike is generated if and only if both  $C$  and  $B$  are activated, and in the correct order. The resulting contour-plot, which  
 223 shows how the output firing rate of this neuron scales with both  $r_C$  and  $r_B$ , illustrates that both a high firing rate of  
 224 population  $C$  and  $B$  are required to result in a high firing rate of the neuron (**Fig. 4d**). This is similar to the neuron with  
 225 two parallel segments  $(C + B) \rightarrow_2 A$  (**Fig. 4e**), only that simultaneous activation of both segments, not sequential  
 226 activation, is required. The shape of this function closely matches an idealized "and" operation (**Fig. 4b**), the firing rate  
 227 of which can be derived as just the product of the rates at which plateaus are triggered in all dendritic segments:

$$\varrho(A, B, C) \propto \tau^{\text{den}} \varrho(r_A) f_{\text{and}}(B, C) \quad \text{where} \quad f_{\text{and}}(B, C) = \tau^{\text{den}^2} \varrho(r_C) \varrho(r_B)$$

228 Here,  $\varrho(A, B, C)$  is the firing rate of the neuron, and  $f_{\text{and}}(B, C)$  is the factor due to the segments  $B$  and  $C$ .

229 For a different dendritic morphology  $(C + B) \rightarrow_1 A$ , where a plateau in either segment  $C$  or  $B$  is sufficient (**Fig. 4f**),  
 230 we see a response that closely resembles an idealized "or" operation (**Fig. 4c**):<sup>3</sup>

$$f_{\text{or}}(B, C) \propto \tau^{\text{den}} \varrho(C) + \tau^{\text{den}} \varrho(B) - f_{\text{and}}(B, C)$$

231 For a derivation of  $f_{\text{and}}$  and  $f_{\text{or}}$  see the Methods section. This rate-based functional description offers a very useful  
 232 abstraction of the neurons' behaviours, but it necessarily neglects questions of timing. As we saw in the previous  
 233 sections, depending on the morphology, a dendritic arbor can impose stringent requirements on the order in which  
 234 different segments can be activated. For example, while both neurons  $C \rightarrow_1 B \rightarrow_1 A$  and  $(C + B) \rightarrow_2 A$  require  
 235 strong input from both input population  $B$  and  $C$  and hence show the same "and"-like response in the rate-coding

<sup>3</sup> As the last equation shows, referring to this operation as an "or" is justified in the sense that the resulting rate is proportional to the addition of the segments' individual plateau-firing-rates minus the "and" operation applied to both, which generalizes the Boolean operation to real values.

236 paradigm, the former imposes the constraint that the input from population  $C$  must arrive *before* that from population  $B$   
237 while the latter does not. Rather than an "and"-like operation, neuron  $C \rightarrow_1 B \rightarrow_1 A$  in fact implemented an "and then"  
238 operation. This is apparent when looking at the joint probability density of the relative timing of dendritic plateaus in  
239 the respective segments directly preceding a somatic spike (**Fig. 5**). In particular, if we only consider the unambiguous  
240 cases of one dendritic plateau each occurring in each segment within a brief window before a somatic spike (shown by  
241 the white dots (**Fig. 5**)), we observe that for neuron  $C \rightarrow_1 B \rightarrow_1 A$ , a dendritic plateau in segment  $B$  can occur at  
242 most 100ms before the somatic spike and is preceded by a dendritic plateau in segment  $C$  by at most another 100ms  
243 for a maximum total delay of 200ms. In contrast for neuron  $(C + B) \rightarrow_2 A$ , both segments must trigger a plateau  
244 within 100ms to elicit a somatic spike. For neuron  $(C + B) \rightarrow_1 A$ , a plateau in either segment within a 100ms window  
245 suffices to trigger a somatic spike.

## 246 Discussion

247 In this theoretical study we showed how a well-known biological phenomenon, dendritic plateau potentials, can  
248 drastically improve the computational capabilities of spiking neurons, turning them into powerful spatio-temporal  
249 pattern detectors. Due to the long-lasting memory provided by these plateau potentials, it becomes possible for  
250 individual neurons to integrate evidence or distinguish specific sequences of input on a timescale of hundreds of  
251 milliseconds – an order of magnitude larger than commonly observed membrane time constants [41]. In our model, the  
252 morphology of a neural dendrite determines its computational function and, when viewed in a conventional rate-coding  
253 paradigm, allows an individual neuron to implement a wide range of nonlinear behaviours in a modular and intuitive  
254 way.

255 This is in line with the two-layer neuron model proposed in [42], which used a detailed biophysical simulation of a  
256 pyramidal neuron to investigate the nonlinear effect on the neuron's firing rate due to synaptic input at different dendritic  
257 branches. Using a diverse array of stimuli, they showed that a two-layer network of sigmoidal subunits provides a  
258 substantially better approximation of the neuron's firing rate than a linear point-neuron. They speculated, however, that  
259 the prediction could be improved further, if the nonlinear interactions between the branches were considered, which we  
260 did here. We also investigated the use of dendritic plateau potentials as long-lasting memory traces, which our results  
261 revealed to be particularly important for evidence integration and the detection of temporal sequences. Remarkably, our  
262 drastically simplified and inherently event-based model could qualitatively reproduce properties of the model in [42],  
263 such as the sigmoidal input-output firing rate response of each dendritic segment and the linear-nonlinear combination  
264 thereof at the soma (see methods section).

265 But on the fast time-scale of individual spikes, our model differs substantially from this and other rate-based point-  
266 neuron models, since it relies on the detection of volleys of coincident spikes on a millisecond time-scale as the basic  
267 units of information, which are then integrated on the slower time-scale of dendritic plateau potentials. Our model  
268 is more closely related to recent work by [43], which proposed the use of active coincidence detection in dendritic  
269 segments to model prolonged effects of basal dendrites on the soma. A similar line of reasoning can also be found  
270 in [44], which presented a very elegant two-compartment neuron model and corresponding learning rule with one  
271 somatic and one dendritic compartment. Both models assign a specific functional role to the (basal) dendrite segments,  
272 namely to predict subsequent activation at the soma from their local synaptic inputs, which allows individual neurons  
273 to learn to predict state-transitions ("prospective coding"). Longer sequences are then detected by networks of such  
274 laterally connected neurons, endowing the networks with a form of temporal sequence-memory ("hierarchical temporal  
275 memory"). In our work, we have focused on a more mechanistic model that heavily relies on biological phenomena  
276 observed in single neurons. This allowed us to describe a neuron's computational capability concretely as that of a  
277 sophisticated pattern detector with long-lasting memory, and to illustrate how these mechanisms at play would appear  
278 under a rate based analysis. We believe our results offer a very appealing explanation of spike-based computation that  
279 has wider implications in neuroscience and raises several important questions, which we briefly discuss in the following:

### 280 What is the role of inhibition for dendritic computation?

281 Our model only takes into account excitatory synapses, but has clear implications for the role of inhibition. The  
282 all-or-none response of dendritic plateau potentials in our model implies that the only significant effect an inhibitory  
283 synapse can have on the far-away soma is by either reducing the likelihood of plateaus, preventing the generation of  
284 plateaus altogether, or by disrupting already ongoing plateau potentials. In the first two cases, an inhibitory synapse's  
285 post-synaptic potential must be either well-timed to coincide with the volley of excitatory spikes or exhibit a longer  
286 time-scale. Experiments suggest that inhibition can affect the ability of dendrites to generate active plateaus and prevent  
287 them [45]. The disruption of ongoing plateaus has also been reported and analyzed [46] and requires no such precise  
288 timing a-priori, as long as the spike occurs within the plateau's duration. Inhibition may, however, exhibit different  
289 effects depending on when during the plateau processes it is received. In all cases, the likely effect is shunting, rather

290 than subtractive, inhibition.  
291 Shunting inhibition can provide an efficient mechanism to improve the computational capabilities of the neurons  
292 described above, for example as it would allow individual neurons to exclusively respond to a sequence  $a \rightarrow c$  but not  
293 to the sequence  $a \rightarrow b \rightarrow c$ , which is impossible for a neuron with purely excitatory synapses. Inhibition may therefore  
294 play an important and distinct role in ADSP neuron that warrants further investigation.

### 295 **What are the implications of this model for plasticity?**

296 We discussed a fundamental mechanism of dendritic computation and its capabilities, but did not cover the important  
297 topic of learning and plasticity. Nevertheless, the model presented here imposes constraints on potential plasticity  
298 mechanisms. Due to the long-lasting plateau potentials, a synaptic input can have a relevant causal effect for a somatic  
299 spike at a much later time. This makes the temporal assignment of credit for spiking outputs to synaptic inputs  
300 fundamentally difficult. The timing-invariance shown by our model and the dependency on the complex nonlinear  
301 dynamics within a dendritic tree further exacerbate this problem.

302 The most prominent example of synaptic learning is spike-time dependent plasticity [47], which tunes synaptic efficacy  
303 based on the relative timing of pre- and post-synaptic activity. Since the active dendritic processes discussed here  
304 both dominate the post-synaptic membrane potential as well as local  $Ca^{2+}$  concentration, they have a major effect on  
305 Hebbian plasticity [48, 49].

306 This is at odds with the common assumption, that backpropagating action potentials (bAPs) from the soma into the  
307 dendrite act as the primary post synaptic signal driving synaptic plasticity [50]. Since dendritic plateau potentials  
308 strongly depolarize dendrite segments for an extended period of time and should similarly “backpropagate” throughout  
309 the dendritic tree, it seems unlikely to us that bAPs are the primary factor for synaptic plasticity in neurons with active  
310 dendritic processes. Resolving this inconsistency is an important, but open research question.

311 Additionally, our model is based on binary stochastic synapses, and which segment the synapse terminates on plays  
312 a more important role than its efficacy. We therefore believe that structural plasticity mechanisms are particularly  
313 relevant for this kind of model. Furthermore, homeostatic plasticity mechanisms, e.g. scaling synaptic transmission  
314 probabilities[51], could be important here to ensure that only sufficiently large spike-volleys, but not randomly correlated  
315 inputs, can reliably trigger plateau potentials.

### 316 **Is neuronal computation based on plateau processes?**

317 Dendritic processes are thought to implement solutions to a number of specific computational problems in neurons [52],  
318 often distributed across many functional dendritic compartments [53, 54]. Based on convincing biological evidence  
319 for the mechanism of plateau generation and the interaction of such plateaus, we have argued that they are indeed the  
320 primary building block for the implementation of behaviorally highly relevant computations. How can this claim be  
321 experimentally verified or falsified?

322 Direct experimental verification, that computation in single neurons is well described by our proposed ADSP neuron  
323 model requires simultaneous measurement of synaptic inputs and local membrane potentials along a single neuron’s  
324 dendrite on a fine temporal and spatial resolution over a long-time span.

325 As a first step, since our model is driven by incoming spike volleys from multiple intact neuron populations, *in vivo*  
326 measurements could verify the existence of patterns of spike-volleys over different time-scales using newly developed  
327 statistical techniques [55, 56].

328 Secondly, a key part of the model, the detection and integration of information across two timescales, one on the order  
329 of a few milliseconds, the other on the order of a hundred milliseconds or more, can be refuted for any type of neuron  
330 that achieves this without reliance on active dendritic processes. This may be the case either for neurons incapable of  
331 generating plateaus in the first place, or if plateau-generating processes have been pharmacologically disabled.

332 Thirdly, we predict single neurons that use active dendritic sequence processing to have spatio-temporal receptive  
333 fields on long temporal time-scales, but with high tolerance to variations in the precise timing of individual plateaus,  
334 qualitatively described in **Fig. 2**. Because of this invariance, we propose to go beyond linear analysis such as spike-  
335 triggered averages and instead measure both somatic response, as well as the timing of plateaus across the dendritic  
336 tree to find structures in the joint distributions as demonstrated in **Fig. 5**. Experimentally, spatio-temporal receptive  
337 fields of this kind could also be found by systematically varying stimuli, and should disappear when plateau-generating  
338 processes are disrupted.

339 While we have based our analysis on NMDAR-mediated plateaus in pyramidal cells [20], the same computational  
340 principle may be found in other neuron types, as well. For example, Purkinje cells in the cerebellum also generate  
341 localized  $Ca^{2+}$  events in response to coincident input on individual dendritic segments [57, 58], and thalamo-cortical  
342 neurons respond to strong synaptic input by localized plateaus in distal dendritic branches [59]. This indicates that the  
343 underlying ADSP mechanism, possibly implemented through diverse means in a case of convergent evolution, may be  
344 very general and ubiquitous in the brain.

## 345 Methods

### 346 Formal description of the event-based framework for computation in active dendrites

347 Mathematically, we approximate both EPSPs and plateau potentials by rectangular pulses with fixed duration  $\tau^{\text{syn}}$  and  
 348  $\tau^{\text{den}}$ , respectively. Here, we chose  $\tau^{\text{syn}} = 5\text{ms}$  and  $\tau^{\text{den}} = 100\text{ms}$  for all experiments if not stated otherwise. The  
 349 dynamics of each dendritic segment can then be fully described in terms of the arrival times of incoming spikes as well  
 350 as the times at which plateau potentials are initiated within the segment itself or in other directly connected segments.  
 351 For some segment  $i$ , the synaptic input  $X_i$  and the dendritic input  $Y_i$  take the form of equations (1) and (2), respectively:

$$X_i(t) = \sum_{j \in S_i} \sum_k \chi_{i,j,k} \cdot \mathbf{1}_{[s_k^j, s_k^j + \tau^{\text{syn}}]}(t) \quad \text{where } \chi_{i,j,k} \sim \text{Bernoulli}(\omega_{i,j}) \quad (1)$$

$$Y_i(t) = \sum_{j \in D_i} \sum_k \mathbf{1}_{[t_k^j, t_k^j + \tau^{\text{den}}]}(t) \quad (2)$$

$$t_{m+1}^i = \min \{ t \in \mathbb{R} \mid t \geq t_m^i + \tau^{\text{den}}, X_i(t) \geq \theta_i^{\text{syn}} \text{ and } Y_i(t) \geq \theta_i^{\text{den}} \}, \quad (3)$$

352 where  $\mathbf{1}_{[a,b]}$  represents a unit pulse during the time interval  $[a, b]$ , and  $s_k^j$  and  $t_k^j$  are the times of spikes arriving from  
 353 some presynaptic neuron  $j$  and the plateau onset times on segment  $i$ , respectively. The random variable  $\chi_{i,j,k}$  represents  
 354 the independent probabilistic transmission of every spike  $k$  from source  $j$  via a synapse to dendritic segment  $i$ , where the  
 355 transmission occurs with the synapse specific probability  $\omega_{i,j}$ . The sets  $S_i$  and  $D_i$  respectively identify the segment's  
 356 synaptic connections to other neurons and which other dendritic segments it is directly coupled to, and therefore reflect  
 357 the morphology of the neuron's dendritic tree. Equation (3) states that, if the segment is not in a plateau state already, a  
 358 new plateau is initiated as soon as both synaptic and dendritic inputs exceed their respective thresholds  $\theta_i^{\text{syn}}$  and  $\theta_i^{\text{den}}$ .

### 359 Implementation of the navigation experiments

360 To simulate the stochastic movements of a rat, random paths are generated with time-varying location  $l(t) =$   
 361  $(X(t), Y(t)) \in \mathbb{R}^2$  as solutions of the following system of stochastic differential equations:

$$\begin{aligned} dX &= \cos(2\pi A)V dt \\ dY &= \sin(2\pi A)V dt \\ dA &= 0.25dW_A \\ dV &= 10.0(0.25 - V)dt + 0.1dW_V \end{aligned}$$

362  $A$  represents the angular heading of the animal,  $V$  represents its velocity in  $\frac{m}{s}$  and  $W_A, W_V$  represent independent  
 363 standard Brownian motion processes. Each path is generated with a randomized initial position within a rectangular  
 364 domain of  $10\text{cm} \times 9.5\text{cm}$ , a random angular heading and a random velocity according to the marginal stationary  
 365 distribution of  $V$  in the equation above, and is simulated for a fixed duration of  $200\text{ms}$ . Three populations of place cells,  
 366 each 20 neurons strong, are centered on a hexagonal grid with center-to-center distance of  $r \approx 2.9\text{cm}$ . Each population  
 367 randomly emits spike volleys following a homogeneous Poisson process with rate  $\lambda = 50\text{Hz}$ . The magnitude of each  
 368 spike volley is determined by the population's mean activity at the time, which depends on the animal's location within  
 369 the environment through a receptive field tuning curve. The tuning curves model the probability of each individual  
 370 neuron within the population to participate in a given spike volley by the bell-curves  $f_i(x) = \exp(-\frac{x-\mu_i}{2\sigma^2})$  with  
 371 coefficient  $\sigma = 9.7\text{mm}$ , centered on the tiles of the hexagonal grid. The total number of spikes emitted during a  
 372 volley from population  $i$  at time  $t$  is therefore a random variable distributed according to a Binomial distribution with  
 373 population size  $n = 20$  and probability  $p = f_i(l(t))$ . Additionally, each neuron in the population emits random spikes  
 374 at a rate of  $5\text{Hz}$  to emulate background activity. Each spike is transmitted through stochastic synapses independently  
 375 with probability 0.5.

376 Each of the simulated neuron's dendritic segments receives spiking input from the 20 neurons of one population and  
 377 requires at least 5 coincident spikes to trigger a plateau potential. The three segments are connected in a chain that  
 378 requires sequential activation by spike volleys from the input populations in correct order to fire a spike. A random  
 379 path is considered to be accepted by the neuron, if the neuron responds with a spike at any point in time during the  
 380 corresponding simulation run.

381 To evaluate the rotation and location sensitivity of the neuron, we also generate straight paths with constant movement  
 382 speed  $v = \frac{3r}{200\text{ms}} \approx 43\text{cm/s}$  that are either rotated around the center of the environment by an angle  $\alpha$  or offset from  
 383 the center by a distance  $\Delta x$  orthogonal to the optimal movement direction. For each angle or offset, respectively, the  
 384 empirical firing probability of the neuron in response to that path is estimated by simulating the path and the neuron's  
 385 responses for 500 times each.

### 386 Implementation of the evidence-integration experiments

387 The input to the evidence-integrating neuron is generated by superimposing spike volleys onto 1000 independent  
 388 Poisson processes with a constant firing rate of 10Hz. The volleys times are generated by a Poisson process with a  
 389 time-varying rate  $\lambda(t)$  representing the incoming "evidence". Here,  $\lambda(t) = 200\text{Hz} \cdot (\mathbf{1}_{[0.25,0.5]}(t) + 2 \cdot \mathbf{1}_{[0.75,1.0]}(t) +$   
 390  $3 \cdot \mathbf{1}_{[1.25,1.5]}(t)) + 20\text{Hz}$ . Each volley consists of simultaneous spikes from a randomly chosen set of ten input neurons  
 391 with consecutive indices (wrapping around from 1000 to 1). Since each EPSP is assumed to last for a duration of 5ms,  
 392 volleys and individual spikes are discarded if they occur less than 5ms after a preceding volley or spike. Each of the  
 393 neuron's 1000 dendritic segments receives synaptic input via stochastic synapses with transmission probability 0.5 from  
 394 20 consecutive input neurons. As the number of input neurons and dendritic segments matches in this example, there  
 395 is exactly one dendritic segment for every group of 20 consecutive input neurons, and each input neuron projects to  
 396 exactly 20 dendritic segments. The total number of the neuron's synapses in this example is therefore 20000. Over  
 397 time, the number of simultaneously active dendritic compartments as well as the times of generated somatic spikes is  
 398 recorded. As a reference, the convolution  $(\lambda \star \Pi)(t)$  of the time-varying rate-function  $\lambda$  with a rectangular filter  $\Pi$  of  
 399 length 100ms and unit-integral is calculated.

### 400 Implementation of the rate-based analysis

401 For the rate-based analysis, four different neurons are constructed. First, a neuron consisting of a single dendritic  
 402 compartment is driven by a total of 25 independent Poisson spike-trains with constant firing rate  $r_A$ . As in all other  
 403 experiments, the duration of each spike is set to  $\tau^{\text{syn}} = 5\text{ms}$ , the duration of a plateau potential is set to  $\tau^{\text{den}} = 100\text{ms}$ .  
 404 By systematically varying  $r_A$  and, for each choice, recording the number of plateau potentials generated during a  
 405 simulation time-interval of 250s we can estimate the smooth function  $\varrho(r_A)$ , which relates the firing rate of the input  
 406 population  $A$  to the resulting rate at which plateau potentials are generated.

407 For each of the three morphologies representing the  $C \rightarrow_1 B \rightarrow_1 A$  neuron, the  $(C + B) \rightarrow_2 A$  neuron and the  
 408  $(C + B) \rightarrow_1 A$  neuron, we systematically vary the input firing rates of both populations  $B$  and  $C$  independently while  
 409 keeping the firing rate of population  $A$  fixed at a constant 25Hz. For each combination, we again record the number of  
 410 somatic spikes generated over a time-interval of 250s. As a reference for these two-dimensional functions, we use an  
 411 idealized "and" and "or" function defined as:

$$f_{\text{and}}(B, C) = \tau^{\text{den}^2} \varrho(r_C) \varrho(r_B) \quad (4)$$

$$f_{\text{or}}(B, C) = \tau^{\text{den}} \varrho(C) + \tau^{\text{den}} \varrho(B) - f_{\text{and}}(B, C) \quad (5)$$

$$= 1 - (1 - \tau^{\text{den}} \varrho(C))(1 - \tau^{\text{den}} \varrho(B)) \quad (6)$$

412 At a firing rate  $r_X$ , a segment driven by population  $X$  is in a plateau state at a given point in time with probability  
 413  $\tau^{\text{den}} \varrho(r_X)$ , therefore the probability that a segment driven by population  $C$  is active at the time that an input from  
 414 population  $B$  arrives, which could in turn activate the next segment, is  $\tau^{\text{den}} \varrho(r_C)$ . The probability that this second  
 415 segment is still active, when yet another volley from population  $A$  arrives to possibly trigger a somatic spike is also  
 416  $\tau^{\text{den}} \varrho(r_B)$ . Therefore the neuron's firing rate is proportional to  $\tau^{\text{den}^2} \varrho(r_C) \varrho(r_B)$ . Similarly, the probability that two  
 417 parallel upstream segments driven by populations  $C$  and  $B$  are simultaneously active at a given point in time is  
 418  $\tau^{\text{den}^2} \varrho(r_C) \varrho(r_B)$ . In contrast, the probability that either upstream segment is active at a given point in time is just  
 419 the probability that not both are simultaneously inactive, i.e.  $1 - (1 - \tau^{\text{den}} \varrho(C))(1 - \tau^{\text{den}} \varrho(B))$ . This expression has  
 420 the nice alternative form  $c + b - cb$ , where  $c = \tau^{\text{den}} \varrho(C)$ ,  $b = \tau^{\text{den}} \varrho(B)$  and  $cb = f_{\text{and}}(B, C)$ , which generalizes the  
 421 Boolean "or" operation to real-valued firing rates. When identifying *true* with 1 and *false* with 0, the truth-table of  
 422 this expressions matches that of the logic expression " $c$  or  $b$ ".

423 To evaluate timing requirements for each of these three neuron morphologies, we run another simulation at constant input  
 424 rates  $r_A = r_B = r_C = 25\text{Hz}$  for a duration of 1h of simulated time. We record the time of each plateau-initiation-event  
 425 in both upstream segments driven by population  $C$  and  $B$  for a time-interval of 200ms preceding each somatic spike. If  
 426 there is exactly one plateau-event from each segment in such a time-interval, we record this as an *unambiguous* pair  
 427 of plateau events. If there is more than one plateau-event on either of the dendritic segments, we record all pairs of

428 plateau-events in that time-interval composed of one plateau event for each segment. We refer to these latter pairs as  
429 *ambiguous*. Using these ambiguous pairs, we estimate the joint probability distribution  $P_i(\Delta t_B, \Delta t_C | t_A)$  over relative  
430 times  $\Delta t_B$  and  $\Delta t_C$  between a plateau triggered by population  $B$  or  $C$  and a somatic spike triggered at time  $t_A$  by  
431 population  $A$ . For a more reliable estimate of the timing constraints, we consider only the unambiguous pairs, which  
432 evidently fall into distinct domains of these joint probability distributions that uniquely characterize the precise timing  
433 requirements of the respective neuron morphologies. This can be seen in figure 5. E.g. for the  $C \rightarrow_1 B \rightarrow_1 A$  neuron,  
434 all plateaus triggered by population  $C$  must precede those triggered by  $B$ , but cannot precede them by more than one  
435 plateau duration of 100ms, therefore they fall into a parallelogram below the diagonal. For the  $(C + B) \rightarrow_2 A$  neuron,  
436 on the other hand, both plateau events must independently occur within 100ms before a somatic spike, and hence fall  
437 into the upper quadrant of the joint density.

#### 438 **Code availability**

439 All simulations are implemented in a custom developed package in the Julia programming language [60], publicly  
440 available via the code repository hosted at <https://github.com/jleugeri/ADSP.jl>. Further documentation of the simulator  
441 and implementation details can be found there.

## 442 References

- 443 [1] J O'Keefe and J Dostrovsky. The hippocampus as a spatial map. preliminary evidence from unit activity in the  
444 freely-moving rat. *Brain Res.*, 34(1):171–175, November 1971.
- 445 [2] Torkel Hafting, Marianne Fyhn, Sturla Molden, May-Britt Moser, and Edvard I Moser. Microstructure of a spatial  
446 map in the entorhinal cortex. *Nature*, 436(7052):801–806, August 2005.
- 447 [3] Martin Stemmler, Alexander Mathis, and Andreas V M Herz. Connecting multiple spatial scales to decode the  
448 population activity of grid cells. *Sci Adv*, 1(11):e1500816, December 2015.
- 449 [4] Howard Eichenbaum. On the integration of space, time, and memory. *Neuron*, 95(5):1007–1018, August 2017.
- 450 [5] Brice Bathellier, Derek L Buhl, Riccardo Accolla, and Alan Carleton. Dynamic ensemble odor coding in the  
451 mammalian olfactory bulb: sensory information at different timescales. *Neuron*, 57(4):586–598, February 2008.
- 452 [6] Bede M Broome, Vivek Jayaraman, and Gilles Laurent. Encoding and decoding of overlapping odor sequences.  
453 *Neuron*, 51(4):467–482, August 2006.
- 454 [7] Huan Luo and David Poeppel. Phase patterns of neuronal responses reliably discriminate speech in human  
455 auditory cortex. *Neuron*, 54(6):1001–1010, June 2007.
- 456 [8] Ofer Melamed, Wulfram Gerstner, Wolfgang Maass, Misha Tsodyks, and Henry Markram. Coding and learning  
457 of behavioral sequences. *Trends Neurosci.*, 27(1):11–4; discussion 14–5, January 2004.
- 458 [9] Gianluigi Mongillo, Omri Barak, and Misha Tsodyks. Synaptic theory of working memory. *Science*,  
459 319(5869):1543–1546, March 2008.
- 460 [10] Yulia Sandamirskaya and Gregor Schöner. An embodied account of serial order: how instabilities drive sequence  
461 generation. *Neural Netw.*, 23(10):1164–1179, December 2010.
- 462 [11] C Beaulieu and M Colonnier. A laminar analysis of the number of round-asymmetrical and flat-symmetrical  
463 synapses on spines, dendritic trunks, and cell bodies in area 17 of the cat. *J. Comp. Neurol.*, 231(2):180–189,  
464 January 1985.
- 465 [12] Katz. *The Release of Neural Transmitter Substances (The Sherrington Lectures)*. Liverpool University Press,  
466 December 1969.
- 467 [13] C F Stevens. Quantal release of neurotransmitter and long-term potentiation. *Cell*, 72 Suppl:55–63, January 1993.
- 468 [14] Michael Hollmann and Stephen Heinemann. Cloned glutamate receptors. *Annual review of neuroscience*,  
469 November 2003.
- 470 [15] JC Watkins and RH Evans. Excitatory amino acid transmitters. *Annual review of pharmacology and toxicology*,  
471 21(1):165–204, 1981.
- 472 [16] Attila Losonczy and Jeffrey C Magee. Integrative properties of radial oblique dendrites in hippocampal CA1  
473 pyramidal neurons. *Neuron*, 50(2):291–307, April 2006.
- 474 [17] W Rall. Electrophysiology of a dendritic neuron model. *Biophys. J.*, 2(2 Pt 2):145–167, March 1962.
- 475 [18] A N Burkitt. A review of the integrate-and-fire neuron model: I. homogeneous synaptic input. *Biol. Cybern.*,  
476 95(1):1–19, July 2006.
- 477 [19] Greg Stuart and Nelson Spruston. Determinants of voltage attenuation in neocortical pyramidal neuron dendrites.  
478 *Journal of Neuroscience*, 18(10):3501–3510, 1998.
- 479 [20] Nelson Spruston. Pyramidal neurons: dendritic structure and synaptic integration. *Nat. Rev. Neurosci.*, 9(3):206–  
480 221, March 2008.
- 481 [21] Michael Häusser. Synaptic function: dendritic democracy. *Current Biology*, 11(1):R10–R12, 2001.
- 482 [22] Jeffrey C Magee and Erik P Cook. Somatic epsp amplitude is independent of synapse location in hippocampal  
483 pyramidal neurons. *Nature neuroscience*, 3(9):895–903, 2000.
- 484 [23] Srdjan D Antic, Wen-Liang Zhou, Anna R Moore, Shaina M Short, and Katerina D Ikonomu. The decade of the  
485 dendritic NMDA spike. *J. Neurosci. Res.*, 88(14):2991–3001, November 2010.
- 486 [24] Katerina D Oikonomou, Mandakini B Singh, Enas V Sterjanaj, and Srdjan D Antic. Spiny neurons of amygdala,  
487 striatum, and cortex use dendritic plateau potentials to detect network UP states. *Front. Cell. Neurosci.*, 8:292,  
488 September 2014.
- 489 [25] H Monyer, N Burnashev, D J Laurie, B Sakmann, and P H Seeburg. Developmental and regional expression in the  
490 rat brain and functional properties of four NMDA receptors. *Neuron*, 12(3):529–540, March 1994.

- 491 [26] T Götz, U Kraushaar, J Geiger, J Lübke, T Berger, and P Jonas. Functional properties of AMPA and NMDA  
492 receptors expressed in identified types of basal ganglia neurons. *J. Neurosci.*, 17(1):204–215, January 1997.
- 493 [27] Sonia Gasparini, Michele Migliore, and Jeffrey C Magee. On the initiation and propagation of dendritic spikes in  
494 CA1 pyramidal neurons. *J. Neurosci.*, 24(49):11046–11056, December 2004.
- 495 [28] Sonia Gasparini and Jeffrey C Magee. State-dependent dendritic computation in hippocampal CA1 pyramidal  
496 neurons. *J. Neurosci.*, 26(7):2088–2100, February 2006.
- 497 [29] Jacopo Bono and Claudia Clopath. Modeling somatic and dendritic spike mediated plasticity at the single neuron  
498 and network level. *Nat. Commun.*, 8(1):706, September 2017.
- 499 [30] Paul Rhodes. The properties and implications of NMDA spikes in neocortical pyramidal cells. *J. Neurosci.*,  
500 26(25):6704–6715, June 2006.
- 501 [31] Guy Major, Matthew E Larkum, and Jackie Schiller. Active properties of neocortical pyramidal neuron dendrites.  
502 *Annu. Rev. Neurosci.*, 36:1–24, July 2013.
- 503 [32] Tim Jarsky, Alex Roxin, William L Kath, and Nelson Spruston. Conditional dendritic spike propagation following  
504 distal synaptic activation of hippocampal CA1 pyramidal neurons. *Nat. Neurosci.*, 8(12):1667–1676, December  
505 2005.
- 506 [33] Christine Grienberger, Xiaowei Chen, and Arthur Konnerth. Nmda receptor-dependent multidendrite ca<sup>2+</sup> spikes  
507 required for hippocampal burst firing in vivo. *Neuron*, 81(6):1274–1281, 2014.
- 508 [34] C Koch, T Poggio, and V Torre. Retinal ganglion cells: a functional interpretation of dendritic morphology. *Philos.*  
509 *Trans. R. Soc. Lond. B Biol. Sci.*, 298(1090):227–263, July 1982.
- 510 [35] Alon Polsky, Bartlett W Mel, and Jackie Schiller. Computational subunits in thin dendrites of pyramidal cells.  
511 *Nat. Neurosci.*, 7(6):621–627, June 2004.
- 512 [36] Tiago Branco and Michael Häusser. The single dendritic branch as a fundamental functional unit in the nervous  
513 system. *Curr. Opin. Neurobiol.*, 20(4):494–502, August 2010.
- 514 [37] Guy Major, Alon Polsky, Winfried Denk, Jackie Schiller, and David W Tank. Spatiotemporally graded NMDA  
515 spike/plateau potentials in basal dendrites of neocortical pyramidal neurons. *J. Neurophysiol.*, 99(5):2584–2601,  
516 May 2008.
- 517 [38] Tiago Branco, Beverley A Clark, and Michael Häusser. Dendritic discrimination of temporal input sequences in  
518 cortical neurons. *Science*, 329(5999):1671–1675, 2010.
- 519 [39] Matthew E Larkum and Thomas Nevian. Synaptic clustering by dendritic signalling mechanisms. *Curr. Opin.*  
520 *Neurobiol.*, 18(3):321–331, June 2008.
- 521 [40] Naoya Takahashi, Kazuo Kitamura, Naoki Matsuo, Mark Mayford, Masanobu Kano, Norio Matsuki, and Yuji  
522 Ikegaya. Locally synchronized synaptic inputs. *Science*, 335(6066):353–356, January 2012.
- 523 [41] Debora Ledergerber and Matthew Evan Larkum. Properties of layer 6 pyramidal neuron apical dendrites. *Journal*  
524 *of Neuroscience*, 30(39):13031–13044, 2010.
- 525 [42] Panayiota Poirazi, Terrence Brannon, and Bartlett W Mel. Pyramidal neuron as two-layer neural network. *Neuron*,  
526 37(6):989–999, 2003.
- 527 [43] Jeff Hawkins and Subutai Ahmad. Why neurons have thousands of synapses, a theory of sequence memory in  
528 neocortex. *Frontiers in neural circuits*, 10:23, 2016.
- 529 [44] Johanni Brea, Alexisz Tamás Gaál, Robert Urbanczik, and Walter Senn. Prospective coding by spiking neurons.  
530 *PLOS Computational Biology*, 12(6):1–25, 06 2016.
- 531 [45] Monika Jadi, Alon Polsky, Jackie Schiller, and Bartlett W Mel. Location-dependent effects of inhibition on local  
532 spiking in pyramidal neuron dendrites. *PLoS Comput Biol*, 8(6):e1002550, 2012.
- 533 [46] Michael Doron, Giuseppe Chindemi, Eilif Muller, Henry Markram, and Idan Segev. Timed synaptic inhibition  
534 shapes nmda spikes, influencing local dendritic processing and global i/o properties of cortical neurons. *Cell*  
535 *reports*, 21(6):1550–1561, 2017.
- 536 [47] Sen Song, Kenneth D Miller, and Larry F Abbott. Competitive hebbian learning through spike-timing-dependent  
537 synaptic plasticity. *Nature neuroscience*, 3(9):919–926, 2000.
- 538 [48] John Lisman and Nelson Spruston. Postsynaptic depolarization requirements for LTP and LTD: a critique of spike  
539 timing-dependent plasticity. *Nat. Neurosci.*, 8(7):839–841, July 2005.
- 540 [49] Jason Hardie and Nelson Spruston. Synaptic depolarization is more effective than back-propagating action  
541 potentials during induction of associative long-term potentiation in hippocampal pyramidal neurons. *J. Neurosci.*,  
542 29(10):3233–3241, March 2009.



- 543 [50] Nicola Kuczewski, Cristophe Porcher, Volkmar Lessmann, Igor Medina, and Jean-Luc Gaiarsa. Back-propagating  
544 action potential. *Communicative & Integrative Biology*, 1(2):153–155, 2008. PMID: 19704877.
- 545 [51] Gina Turrigiano. Homeostatic synaptic plasticity: local and global mechanisms for stabilizing neuronal function.  
546 *Cold Spring Harbor perspectives in biology*, 4(1):a005736, 2012.
- 547 [52] Michael London and Michael Häusser. Dendritic computation. *Annu. Rev. Neurosci.*, 28:503–532, 2005.
- 548 [53] Aaron Kerlin, Mohar Boaz, Daniel Flickinger, Bryan J MacLennan, Matthew B Dean, Courtney Davis, Nelson  
549 Spruston, and Karel Svoboda. Functional clustering of dendritic activity during decision-making. *Elife*, 8:e46966,  
550 2019.
- 551 [54] Hongbo Jia, Nathalie L Rochefort, Xiaowei Chen, and Arthur Konnerth. Dendritic organization of sensory input  
552 to cortical neurons in vivo. *Nature*, 464(7293):1307–1312, April 2010.
- 553 [55] Rory G Townsend and Pulin Gong. Detection and analysis of spatiotemporal patterns in brain activity. *PLoS*  
554 *Comput. Biol.*, 14(12):e1006643, December 2018.
- 555 [56] Min Song, Minseok Kang, Hyeonsu Lee, Yong Jeong, and Se-Bum Paik. Classification of spatiotemporal neural  
556 activity patterns in brain imaging data. *Sci. Rep.*, 8(1):8231, May 2018.
- 557 [57] Yunliang Zang, Stéphane Dieudonné, and Erik De Schutter. Voltage- and Branch-Specific climbing fiber responses  
558 in purkinje cells. *Cell Rep.*, 24(6):1536–1549, August 2018.
- 559 [58] CF Ekerot and O Oscarsson. Prolonged depolarization elicited in purkinje cell dendrites by climbing fibre impulses  
560 in the cat. *The Journal of physiology*, 318(1):207–221, 1981.
- 561 [59] Sigita Augustinaite, Bernd Kuhn, Paul Johannes Helm, and Paul Heggelund. NMDA spike/plateau potentials in  
562 dendrites of thalamocortical neurons. *J. Neurosci.*, 34(33):10892–10905, August 2014.
- 563 [60] Jeff Bezanson, Alan Edelman, Stefan Karpinski, and Viral B Shah. Julia: A fresh approach to numerical computing.  
564 *SIAM review*, 59(1):65–98, 2017.
